# Supplementary material for: Expression of genes encoding inflammasome sensor subunits in the duodenal and colonic mucosae of dogs with chronic enteropathy
Source: PubMed Central journal article supplement — J Vet Med Sci. 2021 Jun 2;83(7):1161–6. doi: 10.1292/jvms.20-0519 (PMC8349800; doi:10.1292/jvms.20-0519), 2021-06-02
Supplement: jvms-83-1161-s001.pdf [file jvms-83-1161-s001.pdf]

Supplementary Table 1. The biographic information of seven healthy dogs.

| Breed  | Sex  | Age (years) | Body weight (kg) |
|--------|------|-------------|------------------|
| Beagle | Male | 4.8         | 11.3             |
| Beagle | Male | 1.6         | 10.9             |
| Beagle | Male | 6.1         | 11.5             |
| Beagle | Male | 6.4         | 11.6             |
| Beagle | Male | 6.1         | 10.9             |
| Beagle | Male | 1.3         | 11.4             |
| Beagle | Male | 1.2         | 10.1             |

Supplementary Table 2. Sequences of oligonucleotide primers.

| Gene                        | Primer  | Sequence (5'-3')         | GenBank accession number | Size (base pair) |
|-----------------------------|---------|--------------------------|--------------------------|------------------|
| <i>NLRP3</i> <sup>a)</sup>  | Forward | ATGGCTGTAGCCTCACCTCACAC  | XM_843284.5              | 135              |
|                             | Reverse | TTAGCACTTCGCAGAGCAGCA    |                          |                  |
| <i>NLRP6</i> <sup>b)</sup>  | Forward | AGCCGGGTCTGGTCATCATC     | XM_540513.5              | 89               |
|                             | Reverse | ACCTTCAGGGCTTTATAGGGCATC |                          |                  |
| <i>NLRP12</i> <sup>c)</sup> | Forward | GAGATGAACTGCACCCATGTCAA  | XM_003432638.4           | 116              |
|                             | Reverse | TGGCTCTAGGCAAAGCTCCAA    |                          |                  |
| <i>GAPDH</i> <sup>d)</sup>  | Forward | CATTGCCCTCAATGACCACT     | NM_001003142.2           | 105              |
|                             | Reverse | TCCTTGGAGGCCATGTAGAC     |                          |                  |
| <i>TBP</i> <sup>e)</sup>    | Forward | CTATTTCTTGGTGTGCATGAGG   | XM_849432.4              | 96               |
|                             | Reverse | CCTCGGCATTCAGTCTTTTC     |                          |                  |
| <i>SDHA</i> <sup>f)</sup>   | Forward | GCCTTGGATCTCTTGATGGA     | XM_535807.5              | 92               |
|                             | Reverse | TTCTTGGCTCTTATGCGATG     |                          |                  |
| <i>HMBS</i> <sup>g)</sup>   | Forward | TCACCATCGGAGCCATCT       | XM_546491                | 112              |
|                             | Reverse | GTTCCCACCACGCTCTTCT      |                          |                  |

*GAPDH*, *TBP*, and *SDHA* were used as reference genes for the duodenal mucosa; *GAPDH*, *TBP*, and *HMBS* were used as reference genes for the colonic mucosa.

<sup>a)</sup>Nucleotide-binding oligomerization domain-like receptor family pyrin domain-containing 3, <sup>b)</sup>Nucleotide-binding oligomerization domain-like receptor family pyrin domain-containing 6, <sup>c)</sup>Nucleotide-binding oligomerization domain-like receptor family pyrin domain-containing 12, <sup>d)</sup>Glyceraldehyde 3-phosphate dehydrogenase, <sup>e)</sup>TATA-binding protein, <sup>f)</sup>Succinate dehydrogenase complex, subunit A, <sup>g)</sup>Hydroxymethylbilane synthase.

Supplementary Table 3. Clinical and histopathological characteristics of 35 dogs with chronic enteropathy.

| Group <sup>a)</sup> ( <i>n</i> ) | Age (years)        | Sex <sup>b)</sup> ( <i>n</i> )      | Body weight (kg)   | Breeds ( <i>n</i> )                                                                                                                                                                                                                                                                                                                                                                      | CCECAI <sup>c)</sup> | Histopathological diagnosis in the duodenum ( <i>n</i> )                                                                                                                                                                                    | WSAVA <sup>d)</sup> score in the duodenum | Histopathological diagnosis in the colon ( <i>n</i> )                                      | WSAVA score in the colon | Clinical signs ( <i>n</i> )                                                                                         |
|----------------------------------|--------------------|-------------------------------------|--------------------|------------------------------------------------------------------------------------------------------------------------------------------------------------------------------------------------------------------------------------------------------------------------------------------------------------------------------------------------------------------------------------------|----------------------|---------------------------------------------------------------------------------------------------------------------------------------------------------------------------------------------------------------------------------------------|-------------------------------------------|--------------------------------------------------------------------------------------------|--------------------------|---------------------------------------------------------------------------------------------------------------------|
| ARE (4)                          | 6.8<br>(4.0-11.6)  | M (1), F (1),<br>Fs (2)             | 12.0<br>(5.2-33.6) | Beagle (1), Border<br>Collie (1),<br>Flat-Coated Retriever<br>(1), Miniature<br>Dachshund (1)                                                                                                                                                                                                                                                                                            | 7 (1-11)             | Lymphoplasmacytic<br>duodenitis (4)                                                                                                                                                                                                         | 10 (4-12)                                 | Lymphoplasmacytic<br>colitis (4)                                                           | 6.5 (2-8)                | Vomiting (4), Large<br>bowel diarrhea (2),<br>Small and large<br>bowel diarrhea (1)                                 |
| FRE (11)                         | 8.0<br>(2.1-14.0)  | M (2), Mn<br>(3), F (2), Fs<br>(4)  | 4.1<br>(1.8-12.4)  | Maltese (2),<br>Miniature Dachshund<br>(2), Toy Poodle (2),<br>Miniature Schnauzer<br>(1), Papillon (1),<br>Pomeranian (1),<br>Shetland Sheepdog<br>(1), Shiba (1)                                                                                                                                                                                                                       | 4 (2-16)             | Lymphoplasmacytic<br>duodenitis (10),<br>Lymphoplasmacytic<br>and eosinophilic<br>duodenitis (1)                                                                                                                                            | 8 (4-11)                                  | Lymphoplasmacytic<br>colitis (9)                                                           | 5 (1-8)                  | Vomiting (6), Large<br>bowel diarrhea (5),<br>Small and large<br>bowel diarrhea (4)                                 |
| IRE (18)                         | 10.0<br>(1.8-14.1) | M (2), Mn<br>(10), F (2),<br>Fs (4) | 6.4<br>(3.3-24.0)  | Pembroke Welsh<br>Corgi (2), Shiba (2),<br>American Pit Bull<br>Terrier (1), Bichon<br>Frise (1), Border<br>Collie (1), Boston<br>Terrier (1), Brussels<br>Griffon (1), Cavalier<br>King Charles Spaniel<br>(1), Cross-breed (1),<br>French Bulldog (1),<br>Jack Russell Terrier<br>(1), Maltese (1),<br>Miniature Dachshund<br>(1), Pug (1), Toy<br>Poodle (1), Wire Fox<br>Terrier (1) | 7.5 (3-14)           | Lymphoplasmacytic<br>duodenitis (13),<br>Lymphoplasmacytic<br>and eosinophilic<br>duodenitis (3),<br>Lymphoplasmacytic<br>and neutrophilic<br>duodenitis (1),<br>Lymphoplasmacytic<br>, neutrophilic, and<br>eosinophilic<br>duodenitis (1) | 10 (3-15)                                 | Lymphoplasmacytic<br>colitis (17),<br>Lymphoplasmacytic<br>and eosinophilic<br>colitis (1) | 5 (1-9)                  | Vomiting (6), Small<br>bowel diarrhea (6),<br>Large bowel<br>diarrhea (3), Small<br>and large bowel<br>diarrhea (9) |
| NRE (2)                          | 10.3<br>(7.5-13.0) | Mn (1), F<br>(1)                    | 10.5<br>(8.4-12.6) | Pembroke Welsh<br>Corgi (1), Shiba (1)                                                                                                                                                                                                                                                                                                                                                   | 12.5 (11-14)         | Lymphoplasmacytic<br>duodenitis (2)                                                                                                                                                                                                         | 9.5 (8-11)                                | Lymphoplasmacytic<br>colitis (2)                                                           | 3 (2-4)                  | Vomiting (1), Small<br>bowel diarrhea (1),<br>Small and large<br>bowel diarrhea (1)                                 |

Age, body weight, CCECAI, and WSAVA score are shown as median (range).

<sup>a)</sup>ARE: Antibiotic-responsive enteropathy; FRE: Food-responsive enteropathy; IRE: Immunosuppressant-responsive enteropathy; NRE: Non-responsive enteropathy, <sup>b)</sup>M: Male, intact; Mn: Male, neutered; F: Female, intact; Fs: Female, spayed, <sup>c)</sup>Canine chronic enteropathy clinical activity index, <sup>d)</sup>World small animal veterinary association.

Supplementary Table 4. Hematological and blood biochemical analyses of 35 dogs with chronic enteropathy.

| Variable                                       | Median (range)   | Reference interval | <i>n</i> |
|------------------------------------------------|------------------|--------------------|----------|
| White blood cell ( $\times 10^2/\mu\text{l}$ ) | 96 (45-295)      | 50.5-167.6         | 35/35    |
| Packed cell volume (%)                         | 47.1 (27.6-58.9) | 37.3-61.7          | 35/35    |
| Platelet ( $\times 10^4/\mu\text{l}$ )         | 42.1 (10.7-86.4) | 14.8-48.4          | 35/35    |
| Glucose (mg/dl)                                | 107 (78-148)     | 75-128             | 35/35    |
| Blood urea nitrogen (mg/dl)                    | 16.6 (6.7-45.7)  | 9.2-29.2           | 35/35    |
| Creatinine (mg/dl)                             | 0.7 (0.4-2.0)    | 0.4-1.4            | 35/35    |
| Aspartate aminotransferase (U/l)               | 36 (22-92)       | 17-44              | 33/35    |
| Alanine aminotransferase (U/l)                 | 46 (19-509)      | 17-78              | 35/35    |
| Alkaline phosphatase (U/l)                     | 152 (45-954)     | 47-254             | 35/35    |
| Total bilirubin (mg/dl)                        | 0.2 (0.1-0.4)    | 0.1-0.5            | 34/35    |
| Total cholesterol (mg/dl)                      | 156.5 (49-326)   | 111-312            | 34/35    |
| Total protein (g/dl)                           | 5.4 (3.0-8.1)    | 5.0-7.2            | 35/35    |
| Albumin (g/dl)                                 | 2.6 (1.0-4.0)    | 2.6-4.0            | 35/35    |
| Lipase <sup>a)</sup> (U/l)                     | 83.5 (11-1634)   | <160               | 26/35    |
| Trypsin-like immunoreactivity (ng/ml)          | 27.0 (7.5-50.0)  | >5.2               | 29/35    |
| C-reactive protein (mg/dl)                     | 0.4 (0.0-20.0)   | <1.0               | 34/35    |
| Calcium (mg/dl)                                | 10.0 (6.2-16.0)  | 9.3-12.1           | 28/35    |
| Phosphorus (mg/dl)                             | 3.7 (1.7-4.9)    | 1.9-5.0            | 27/35    |
| Sodium (mmol/l)                                | 148 (140-155)    | 141-152            | 35/35    |
| Potassium (mmol/l)                             | 4.1 (3.4-5.5)    | 3.8-5.0            | 35/35    |
| Chloride (mmol/l)                              | 112 (96-123)     | 102-117            | 35/35    |

<sup>a)</sup>FUJI DRI-CHEM lipase

Supplementary Table 5. The correlations between mRNA expression levels of *NLRP3* and *NLRP12* in the colonic mucosa of dogs with chronic enteropathy or food-responsive enteropathy.

|                             | CE <sup>a)</sup>           | FRE <sup>b)</sup>    |
|-----------------------------|----------------------------|----------------------|
|                             | <i>NLRP3</i> <sup>c)</sup> | <i>NLRP3</i>         |
| <i>NLRP12</i> <sup>d)</sup> | $r_s=0.3636, P=0.0375$     | $r=0.3272, P=0.3901$ |

The correlation between mRNA expression levels of *NLRP3* and *NLRP12* in the colonic mucosa of dogs with CE was analyzed by the Spearman's rank correlation coefficient ( $r_s$ ), while that was calculated by the Pearson product-moment correlation coefficient ( $r$ ) in dogs with FRE.

<sup>a)</sup>Chronic enteropathy, <sup>b)</sup>Food-responsive enteropathy, <sup>c)</sup>Nucleotide-binding oligomerization domain-like receptor family pyrin domain-containing 3, <sup>d)</sup>Nucleotide-binding oligomerization domain-like receptor family pyrin domain-containing 12.

Supplementary Table 6. The number of dogs that developed large bowel diarrhea in dogs with chronic enteropathy.

|         | Large bowel diarrhea |   |
|---------|----------------------|---|
|         | +                    | - |
| ARE     | 3                    | 1 |
| FRE     | 9                    | 2 |
| IRE/NRE | 13                   | 7 |

The numbers in the table indicate the number of dogs. The Fisher's exact test did not detect a significant association between the number of dogs that developed large bowel diarrhea and ARE, FRE, or IRE/NRE ( $P=0.7492$ ).

<sup>a)</sup>ARE: Antibiotic-responsive enteropathy; FRE: Food-responsive enteropathy; IRE: Immunosuppressant-responsive enteropathy; NRE: Non-responsive enteropathy.

Supplementary Table 7. The correlations between mRNA expression levels of inflammasome sensor subunits and clinical or histopathological severity score in the colonic mucosa of dogs with chronic enteropathy or food-responsive enteropathy

|                           | CE <sup>a)</sup>           |                             | FRE <sup>b)</sup>      |                        |
|---------------------------|----------------------------|-----------------------------|------------------------|------------------------|
|                           | <i>NLRP3</i> <sup>c)</sup> | <i>NLRP12</i> <sup>d)</sup> | <i>NLRP3</i>           | <i>NLRP12</i>          |
| CCECAI <sup>e)</sup>      | $r_s = -0.12, P = 0.51$    | $r_s = -0.14, P = 0.45$     | $r_s = 0.41, P = 0.27$ | $r_s = 0.36, P = 0.34$ |
| WSAVA <sup>f)</sup> score | $r_s = 0.13, P = 0.46$     | $r_s = 0.15, P = 0.40$      | $r_s = 0.57, P = 0.24$ | $r_s = 0.13, P = 0.74$ |

The correlations were analyzed by the Spearman's rank correlation coefficient ( $r_s$ ).

<sup>a)</sup>Chronic enteropathy, <sup>b)</sup>Food-responsive enteropathy, <sup>c)</sup>Nucleotide-binding oligomerization domain-like receptor family pyrin domain-containing 3,

<sup>d)</sup>Nucleotide-binding oligomerization domain-like receptor family pyrin domain-containing 12, <sup>e)</sup>Canine chronic enteropathy clinical activity index,

<sup>f)</sup>World small animal veterinary association.
